# Supplementary material for: Perspectives on Low Temperature Tolerance and Vernalization Sensitivity in Barley: Prospects for Facultative Growth Habit
Source: Front Plant Sci. 2020 Nov 9;11:585927. doi: 10.3389/fpls.2020.585927 (PMC7814503; doi:10.3389/fpls.2020.585927)
Supplement: Supplementary file 2 [file Table_2.XLSX]

## Sheet: Sheet1
SUPPLEMENTARY TABLE S2 | Data on contributors and participants in the GWAS analysis of winter survival. Environments are defined in the text. Data from Partial sets were not used due to limited population size.
Country	Institution/Company	Principal investigator(s)	Germplasm donor	Genotype data provider	Phenotyping Full set	Phenotyping Partial set	Location(s)
Canada	Alberta Agriculture and Forestry	Flavio Capettini et al.			x		Lacombe, Alberta
France	Limagrain Cereal Seeds	Ann-Marie Bochard	x	x
France	Secobra Recherche	Amelie Genty et al.	x		x		Champagne, Maule
Germany	Ackermann Saatzucht GmbH & Co. KG	Claus Einfeldt et al.	x			x	Irlbach, Bavaria
Germany	Saatzucht Josef Breun GmbH&Co. KG	Michael Gotz	x
Germany	Bayerische Landensanstalt für Landwitschaft	Markus Hertz	x		x		Freising and Oberhummel
Germany	KWS Saat SE	Viktor Korzun	x
Germany	Getreidezuechtungsforschung Darzau	Karl Josef Muller	x
Hungary	Centre for Agricultural Research, Martonvasar	Ildiko Karsai et al.	x		x		Martonvasar
Italy	Consiglio per la Ricerca e la Sperimentazione in Agricoltura	Luigi Cattivelli	x
Japan	Tohoku Agricultural Research Center NARO/Okayama University	Toshiki Nakamura, Kauhiro Sato et al.	x			x	Morioka, Iwate
UK	James Hunton Institute	Bill Thomas et al.	x		x		Dundee
Spain	Estacion Experimental de Aula Dei (CSIC)	Ernesto Igartua, Ana Casas, Ignacio Romagoza et al.	x		x		Badules, Zaragoza
USA	USDA-ARS, Idaho	Gongshe Hu et al.	x		x		Aberdeen, Idaho
USA	University of Minnesota	Kevin Smith et al.	x		x		Saint Paul, Minnesota
USA	University of Nebraska	P. Stephen Baenziger et al.	x		x		Mead, Nebraska
USA	The Ohio State University	Eric J. Stockinger	x		x		Wooster, Ohio
USA	Oregon State University	Patrick Hayes, Alfonso Cuesta-Marcos et al.	x		x		Corvallis, Oregon
Uzbekistan	Central Asia & Caucasus (CAC) Regional Program	Ram Sharma	x
